# Supplementary material
Source: PubMed Central journal article supplement (PMC4147047)
Supplement: 12248_2014_9626_MOESM1_ESM.pdf [file 12248_2014_9626_MOESM1_ESM.pdf]

## **Supplemental Data**

### **Application of a Physiologically Based Pharmacokinetic Model Informed by a Top-Down Approach for the Prediction of Pharmacokinetics in Chronic Kidney Disease Patients**

Hiroyuki Sayama, Hiroaki Takubo, Hiroshi Komura, Motohiro Kogayu, Masahiro Iwaki

**Supplementary Table S1**

**Summary of *in vitro* and *in vivo* Data for Analysis of Pharmacokinetics in Chronic Kidney Disease**

| Drug              | $f_p$  |        |        | $V_{ss}$ (mL/kg) |      |      | $f_e$  |       |        | CL (mL/min/kg) |       |       | Normalized AUC (ng hr/mL) |         |         | $t_{1/2}$ (hr) |      |      | Analysis of Alteration |          |                 |                     | Prediction |    | Ref |    |
|-------------------|--------|--------|--------|------------------|------|------|--------|-------|--------|----------------|-------|-------|---------------------------|---------|---------|----------------|------|------|------------------------|----------|-----------------|---------------------|------------|----|-----|----|
|                   | HV     | Mod    | Sev    | HV               | Mod  | Sev  | HV     | Mod   | Sev    | HV             | Mod   | Sev   | HV                        | Mod     | Sev     | HV             | Mod  | Sev  | $f_p$                  | $V_{ss}$ | CL <sub>R</sub> | CL <sub>UnItH</sub> | CL         | PK |     |    |
| Alfuzosin         |        |        |        |                  |      |      | 0.11   | 0.086 | 0.015  |                |       |       | 1870                      | 3041    | 2831    |                |      |      |                        |          |                 | x                   |            |    | 59  |    |
| Aliskiren         |        |        |        |                  |      |      | 0      | 0     | 0      |                |       |       | 169                       | 544     | 258     |                |      |      |                        |          |                 | x                   |            |    | 83  |    |
| Alvimopan         |        |        |        |                  |      |      | 0      | 0     | 0      |                |       |       | 291                       | 310     | 437     |                |      |      |                        |          |                 | x                   |            |    | PP  |    |
| Argatroban        |        |        |        | 156              | 164  | 200  |        |       |        |                |       |       |                           |         |         |                |      |      |                        |          | x               |                     |            |    | PP  |    |
| Aripiprazole      | 0.0154 |        | 0.0146 |                  |      |      | 0.0005 |       | 0.0018 |                |       |       | 43755                     |         | 34624   |                |      |      |                        |          | x               |                     | x          |    | 57  |    |
| Asenapine         | 0.037  | 0.042  | 0.043  |                  |      |      | 0      | 0     | 0      |                |       |       | 606                       | 665     | 680     |                |      |      |                        |          | x               |                     | x          |    | 67  |    |
| Azilsartan        |        |        |        |                  |      |      | 0.081  | 0.038 | 0.011  |                |       |       | 45182                     | 64955   | 75109   |                |      |      |                        |          |                 |                     | x          |    | 69  |    |
| Aztreonam         | 0.464  | 0.558  | 0.536  | 200              | 170  | 190  | 0.6    | 0.38  | 0.24   | 1.306          | 0.616 | 0.426 |                           |         |         |                |      |      |                        | x        | x               | x                   |            | x  | PP  |    |
| Batanopride*      | 0.46   | 0.36   | 0.35   | 1476             | 1791 | 1445 | 0.2    | 0.14  | 0.05   | 9.154          | 8.630 | 5.756 |                           |         |         | 2.7            | 3.3  | 4.8  |                        | x        | x               |                     |            | x  | x   | 77 |
| Bivalirudin       | 1      |        |        |                  |      |      | 0.341  | 0.232 |        | 3.700          | 2.500 |       |                           |         |         |                |      |      |                        |          |                 |                     |            | x  | PP  |    |
| Bosentan          |        |        |        |                  |      |      | 0      |       | 0      |                |       |       | 4211                      |         | 4211    |                |      |      |                        |          |                 |                     | x          |    | 28  |    |
| Bupropion         |        |        |        |                  |      |      | 0      | 0     |        |                |       |       | 241                       | 573     |         |                |      |      |                        |          |                 |                     | x          |    | 82  |    |
| Cabergoline       |        |        |        |                  |      |      | 0.012  | 0.013 | 0.004  |                |       |       | 200                       | 264     | 198     |                |      |      |                        |          |                 |                     |            | x  | PP  |    |
| Candesartan       | 0.005  |        | 0.008  |                  |      |      |        |       |        |                |       |       |                           |         |         |                |      |      |                        |          | x               |                     |            |    | PP  |    |
| Carumonam*        | 0.82   |        |        | 184              | 215  | 187  | 0.782  | 0.546 | 0.426  | 1.435          | 0.594 | 0.309 |                           |         |         | 2.0            | 4.3  | 8.1  |                        |          | x               | x                   |            | x  | x   | 39 |
| Cefepime*         | 0.2    |        |        | 152              | 196  | 211  | 0.877  | 0.776 | 0.458  | 1.264          | 0.464 | 0.272 |                           |         |         | 2.0            | 6.0  | 11.2 |                        |          | x               | x                   |            | x  | x   | 23 |
| Cefotetan*        | 0.12   |        |        | 166              | 165  | 148  | 0.494  | 0.463 | 0.289  | 0.595          | 0.272 | 0.199 |                           |         |         | 4.3            | 8.3  | 10.4 |                        |          | x               | x                   |            | x  | x   | 72 |
| Cerivastatin      | 0.0075 | 0.0083 | 0.0115 |                  |      |      | 0      | 0     | 0      |                |       |       | 3150000                   | 7396667 | 5250000 |                |      |      |                        |          | x               |                     | x          |    | 84  |    |
| Cidofovir*        | 0.05   |        |        | 323              | 371  | 301  | 0.86   | 0.69  | 0.75   | 1.819          | 0.479 | 0.202 |                           |         |         | 2.5            | 11.6 | 20.9 |                        |          | x               | x                   |            | x  | x   | 11 |
| Cilostazol        | 0.0347 | 0.0376 | 0.0439 |                  |      |      | 0      | 0     | 0      |                |       |       | 9850                      | 8465    | 5769    |                |      |      |                        |          | x               |                     | x          |    | 56  |    |
| Cinacalcet        | 0.053  | 0.073  | 0.069  |                  |      |      |        |       |        |                |       |       |                           |         |         |                |      |      |                        |          | x               |                     |            |    | PP  |    |
| Cinaciguat        | 0.0045 | 0.0053 | 0.0066 | 224              | 304  | 289  |        |       |        |                |       |       |                           |         |         |                |      |      |                        |          | x               | x                   |            |    | 50  |    |
| Clazosentan       | 0.02   |        | 0.036  | 344              |      | 385  |        |       |        |                |       |       |                           |         |         |                |      |      |                        |          | x               | x                   |            |    | 12  |    |
| Clobazam          | 0.11   | 0.121  |        |                  |      |      | 0.018  | 0.021 |        |                |       |       | 43824                     | 41983   |         |                |      |      |                        |          | x               |                     | x          |    | PP  |    |
| Conivaptan        | 0.0052 | 0.0053 | 0.0056 |                  |      |      | 0      | 0     | 0      |                |       |       | 651                       | 1176    | 1155    |                |      |      |                        |          | x               |                     | x          |    | PP  |    |
| Cyclophosphamide* | 0.85   |        |        | 466              | 564  | 427  | 0.191  | 0.058 | 0.056  | 1.587          | 0.899 | 0.638 |                           |         |         | 3.2            | 6.0  | 7.7  |                        |          | x               |                     |            | x  | x   | 37 |
| Dalfopristin      |        |        |        | 420              |      | 400  |        |       |        |                |       |       |                           |         |         |                |      |      |                        |          |                 | x                   |            |    | 20  |    |
| Daptomycin        | 0.108  | 0.098  | 0.124  |                  |      |      | 0.554  | 0.354 | 0.223  | 0.132          | 0.067 | 0.058 |                           |         |         |                |      |      |                        |          |                 |                     | x          |    | PP  |    |
| Darifenacin       | 0.02   | 0.012  | 0.011  |                  |      |      | 0      | 0     | 0      |                |       |       | 232                       | 532     | 252     |                |      |      |                        |          | x               |                     | x          |    | PP  |    |
| Desloratadine     |        |        |        |                  |      |      | 0      | 0     | 0      |                |       |       | 582                       | 1232    | 1335    |                |      |      |                        |          |                 |                     | x          |    | PP  |    |
| Desmopressin      |        |        |        | 543              | 629  | 543  |        |       |        |                |       |       |                           |         |         |                |      |      |                        |          |                 | x                   |            |    | 1   |    |
| Desvenlafaxine    |        |        |        |                  |      |      | 0.336  | 0.248 | 0.185  |                |       |       | 3490                      | 5572    | 6661    |                |      |      |                        |          |                 |                     | x          |    | 65  |    |
| Dexmedetomidine   |        |        |        | 1310             |      | 1400 |        |       |        |                |       |       |                           |         |         |                |      |      |                        |          |                 | x                   |            |    | PP  |    |
| Dofetilide        | 0.371  | 0.321  |        |                  |      |      |        |       |        |                |       |       |                           |         |         |                |      |      |                        |          | x               |                     |            |    | PP  |    |
| Doripenem         | 0.919  |        |        | 201              | 199  | 209  | 0.83   | 0.703 | 0.427  | 2.806          | 1.028 | 0.555 |                           |         |         |                |      |      |                        |          |                 | x                   | x          |    | PP  |    |
| Doxazosin         |        |        |        |                  |      |      | 0      |       | 0      |                |       |       | 9583                      |         | 11508   |                |      |      |                        |          |                 |                     | x          |    | 14  |    |
| Emedastine        |        |        |        |                  |      |      | 0      |       | 0      |                |       |       | 699                       |         | 1720    |                |      |      |                        |          |                 |                     | x          |    | 44  |    |
| Empagliflozin     |        |        |        |                  |      |      | 0.161  | 0.077 | 0.036  |                |       |       | 4346                      | 5128    | 6670    |                |      |      |                        |          |                 |                     | x          |    | 54  |    |

\*, PK parameters were recalculated from plsama concentration-time profile; HV, Healthy Volunteer; Mod, Moderate CKD; Sev, Severe CKD; PP, PharmaPendium database

**Supplementary Table S1**  
Continued

| Drug           | $f_p$  |        |        | $V_{ss}$ (mL/kg) |       |       | $f_e$    |          |         | CL (mL/min/kg) |       |       | Normalized AUC (ng hr/mL) |       |       | $t_{1/2}$ (hr) |      |      | Analysis of Alteration |          |        |             | Prediction |    | Ref |    |        |
|----------------|--------|--------|--------|------------------|-------|-------|----------|----------|---------|----------------|-------|-------|---------------------------|-------|-------|----------------|------|------|------------------------|----------|--------|-------------|------------|----|-----|----|--------|
|                | HV     | Mod    | Sev    | HV               | Mod   | Sev   | HV       | Mod      | Sev     | HV             | Mod   | Sev   | HV                        | Mod   | Sev   | HV             | Mod  | Sev  | $f_p$                  | $V_{ss}$ | $CL_R$ | $CL_{UmtH}$ | CL         | PK |     |    |        |
| Enprofylline*  | 0.55   | 0.586  | 0.661  | 647              | 480   | 456   | 0.822    | 0.68     | 0.311   | 4.196          | 1.348 | 0.347 |                           |       |       | 2.0            | 4.5  | 15.8 | x                      | x        | x      |             |            | x  | x   | 52 |        |
| Eplerenone     |        |        |        |                  |       |       | 0.02     | 0.016    | 0.009   |                |       |       | 9881                      | 11423 | 12740 |                |      |      |                        |          |        | x           |            |    |     | 70 |        |
| Eprosartan     | 0.014  | 0.016  | 0.027  |                  |       |       | 0.0278   | 0.0218   | 0.0028  |                |       |       | 1144                      | 1379  | 1963  |                |      |      | x                      |          |        |             | x          |    |     | 60 |        |
| Ertapenem      | 0.06   |        |        | 114              | 95    | 105   | 0.431    | 0.383    | 0.225   | 0.417          | 0.191 | 0.105 |                           |       |       |                |      |      |                        | x        | x      |             |            | x  |     | PP |        |
| Eszopiclone    |        |        |        |                  |       |       | 0.0676   | 0.0591   | 0.0492  |                |       |       | 6525                      | 9616  | 10488 |                |      |      |                        |          |        |             | x          |    |     | PP |        |
| Etoricoxib     | 0.081  |        | 0.126  | 1771             |       | 1886  | 0        | 0        | 0       |                |       |       | 19536                     | 20248 | 18293 |                |      |      | x                      | x        |        |             | x          |    |     | 2  |        |
| Exemestane     |        |        |        |                  |       |       | 0.001    | 0.0004   | 0.0005  |                |       |       | 86                        | 233   | 191   |                |      |      |                        |          |        |             | x          |    |     | 41 |        |
| Febuxostat     | 0.009  | 0.008  | 0.012  |                  |       |       | 0.017    | 0.0125   | 0.00759 |                |       |       | 7688                      | 10392 | 14438 |                |      |      | x                      |          |        |             | x          |    |     | 61 |        |
| Felbamate      |        |        |        |                  |       |       | 0.291    | 0.212    | 0.12    |                |       |       | 30683                     | 49933 | 52850 |                |      |      |                        |          |        |             |            | x  |     | 34 |        |
| Felcainide     |        |        |        | 7300             | 7700  |       |          |          |         |                |       |       |                           |       |       |                |      |      |                        |          | x      |             |            |    |     | PP |        |
| Fenofibrate    | 0.0083 | 0.0151 | 0.0198 |                  |       |       |          |          |         |                |       |       |                           |       |       |                |      |      | x                      |          |        |             |            |    |     | PP |        |
| Fesoterodine   | 0.54   | 0.43   | 0.43   |                  |       |       | 0.07     | 0.04     | 0.028   |                |       |       | 334                       | 612   | 778   |                |      |      | x                      |          |        |             | x          |    |     | PP |        |
| Fexofenadine   |        |        |        |                  |       |       | 0.1      | 0.0655   | 0.0244  |                |       |       | 1386                      | 2797  | 3967  |                |      |      |                        |          |        |             |            | x  |     | PP |        |
| Fingolimod     |        |        |        |                  |       |       | 0        |          | 0       |                |       |       | 3738                      |       | 5931  |                |      |      |                        |          |        |             |            | x  |     | PP |        |
| Fludarabine    | 0.75   |        |        |                  |       |       | 0.641    | 0.558    | 0.359   | 2.271          | 1.900 | 0.957 |                           |       |       |                |      |      |                        |          |        |             |            | x  |     | PP |        |
| Flutamide      |        |        |        |                  |       |       | 0.000098 | 0.000056 | 0.00012 |                |       |       | 25                        | 23    | 26    |                |      |      |                        |          |        |             |            | x  |     | 4  |        |
| Fluvastatin    |        |        |        |                  |       |       | 0        | 0        | 0       |                |       |       | 595                       | 751   | 679   |                |      |      |                        |          |        |             |            | x  |     | 6  |        |
| Fondaparinux   | 0.06   |        |        | 126              | 114   | 121   | 0.66     | 0.47     | 0.17    | 0.111          | 0.049 | 0.020 |                           |       |       |                |      |      |                        |          | x      | x           |            |    | x   | PP |        |
| Foscarnet      |        |        |        | 310              | 430   | 570   |          |          |         |                |       |       |                           |       |       |                |      |      |                        |          |        |             |            | x  |     | PP |        |
| Fosfluconazole | 0.042  | 0.05   | 0.05   | 150              | 150   | 160   | 0.018    | 0.02     | 0.004   | 1.280          | 1.420 | 1.370 |                           |       |       |                |      |      | x                      | x        |        |             |            | x  |     | 76 |        |
| Fosinopril     |        |        |        | 134              | 127   | 166   |          |          |         |                |       |       |                           |       |       |                |      |      |                        |          |        |             |            | x  |     | 40 |        |
| Gadobenate     | 1      |        |        | 347              | 256   | 221   | 0.868    | 0.744    | 0.692   | 2.629          | 0.686 | 0.357 |                           |       |       |                |      |      |                        |          | x      | x           |            |    | x   | PP |        |
| Gadobutrol     | 1      |        |        | 200              |       | 220   | 1        |          | 0.773   | 1.386          |       | 0.157 |                           |       |       |                |      |      |                        |          |        |             | x          | x  |     | PP |        |
| Gadofosveset   | 0.164  |        |        | 160              | 190   | 180   | 0.742    | 0.691    | 0.658   | 0.119          | 0.069 | 0.050 |                           |       |       |                |      |      |                        |          |        |             | x          | x  |     | PP |        |
| Gadoxetate     | 0.1    |        |        | 279              | 231   |       | 0.484    | 0.436    |         | 1.443          | 0.994 |       |                           |       |       |                |      |      |                        |          |        |             |            | x  | x   |    | PP     |
| Grepfloxacin   |        |        |        |                  |       |       | 0.051    | 0.027    | 0.015   |                |       |       | 1628                      | 2759  | 1938  |                |      |      |                        |          |        |             |            |    | x   |    | 32     |
| Hydromorphone  |        |        |        |                  |       |       | 0        | 0        |         |                |       |       | 221                       | 426   |       |                |      |      |                        |          |        |             |            |    | x   |    | 31     |
| Iloperidone    |        |        |        |                  |       |       | 0        |          | 0       |                |       |       | 649                       |       | 805   |                |      |      |                        |          |        |             |            |    | x   |    | PP     |
| Iomeprol       | 1      |        |        | 229              | 223   | 272   | 0.935    | 0.851    | 0.683   | 1.848          | 0.546 | 0.266 |                           |       |       |                |      |      |                        |          |        |             |            | x  | x   |    | 51     |
| Isepamicin*    | 0.945  |        |        | 91               | 155   | 167   | 1        | 0.94     | 0.773   | 0.501          | 0.198 | 0.099 |                           |       |       | 3.1            | 11.9 | 29.1 |                        |          |        |             |            | x  | x   |    | 36     |
| Itraconazole   | 0.0025 | 0.0027 | 0.0031 | 9486             | 12857 | 12314 |          |          |         |                |       |       |                           |       |       |                |      |      | x                      | x        |        |             |            |    |     | PP |        |
| Ketoprofen     | 0.0057 | 0.0075 | 0.0086 |                  |       |       | 0        | 0        | 0       |                |       |       | 12133                     | 17733 | 25200 |                |      |      | x                      |          |        |             | x          |    |     | PP |        |
| Lamotrigine    |        |        |        |                  |       |       | 0.0811   |          | 0.054   |                |       |       | 33110                     |       | 36085 |                |      |      |                        |          |        |             |            |    | x   |    | 87     |
| Lenalidomide   | 0.598  | 0.628  | 0.602  |                  |       |       |          |          |         |                |       |       |                           |       |       |                |      |      | x                      |          |        |             |            |    |     | 19 |        |
| Letrozole      |        |        |        |                  |       |       | 0        | 0        | 0       |                |       |       | 36512                     | 49756 | 26600 |                |      |      |                        |          |        |             |            |    | x   |    | PP     |
| Lidocaine*     | 0.3    |        |        | 1723             | 1736  | 1521  | 0        | 0        | 0       | 11.37          | 8.763 | 5.070 |                           |       |       | 2.3            | 3.1  | 4.4  |                        |          |        |             |            | x  |     | x  | 25     |
| Linagliptin    |        |        |        |                  |       |       | 0.232    | 0.368    | 0.308   |                |       |       | 793                       | 1231  | 989   |                |      |      |                        |          |        |             |            |    | x   |    | 35     |
| Linezolid      |        |        |        | 693              | 613   | 633   | 0.311    | 0.285    | 0.098   |                |       |       | 13750                     | 16000 | 16510 |                |      |      |                        |          |        |             |            |    | x   |    | 10, 53 |

\*, PK parameters were recalculated from plsama concentration-time profile; HV, Healthy Volunteer; Mod, Moderate CKD; Sev, Severe CKD; PP, PharmaPendium database

**Supplementary Table S1**  
Continued

| Drug           | $f_p$   |         |         | $V_{ss}$ (mL/kg) |      |      | $f_e$ |        |        | CL (mL/min/kg) |       |       | Normalized AUC (ng hr/mL) |        |        | $t_{1/2}$ (hr) |     |     | Analysis of Alteration |          |        |            | Prediction |    | Ref |  |    |    |
|----------------|---------|---------|---------|------------------|------|------|-------|--------|--------|----------------|-------|-------|---------------------------|--------|--------|----------------|-----|-----|------------------------|----------|--------|------------|------------|----|-----|--|----|----|
|                | HV      | Mod     | Sev     | HV               | Mod  | Sev  | HV    | Mod    | Sev    | HV             | Mod   | Sev   | HV                        | Mod    | Sev    | HV             | Mod | Sev | $f_p$                  | $V_{ss}$ | $CL_R$ | $CL_{UmH}$ | CL         | PK |     |  |    |    |
| Losartan       |         |         |         |                  |      |      |       |        |        |                |       |       | 776                       | 849    | 1232   |                |     |     |                        |          |        |            |            |    | x   |  | PP |    |
| Maribavir      | 0.0011  | 0.0012  | 0.0015  |                  |      |      |       |        |        |                |       |       |                           |        |        |                |     |     | x                      |          |        |            |            |    |     |  | 78 |    |
| Meloxicam      | 0.00545 | 0.00661 | 0.00926 |                  |      |      |       |        |        |                |       |       |                           |        |        |                |     |     | x                      |          |        |            |            |    |     |  | PP |    |
| Memantine      | 0.592   | 0.588   | 0.682   |                  |      |      | 0.337 | 0.236  | 0.162  |                |       |       | 5682                      | 10912  | 13467  |                |     |     | x                      |          |        |            | x          |    |     |  | 62 |    |
| Meperidine     | 0.418   | 0.555   |         | 3990             | 3850 |      | 0.069 | 0.127  |        | 4.854          | 1.849 |       |                           |        |        |                |     |     | x                      | x        |        |            |            | x  |     |  | 16 |    |
| Meropenem*     | 0.98    |         |         | 165              | 182  | 193  | 0.77  | 0.53   | 0.38   | 2.671          | 1.048 | 0.684 |                           |        |        | 0.9            | 2.4 | 4.4 |                        | x        | x      |            |            | x  | x   |  |    | 21 |
| Metoclopramide |         |         |         |                  |      |      | 0.219 | 0.204  | 0.113  | 8.020          | 3.670 | 3.590 |                           |        |        |                |     |     |                        |          |        |            |            | x  |     |  | 49 |    |
| Metoprolol     | 0.88    |         |         | 3200             |      | 3500 | 0.145 |        | 0.03   | 11.43          |       | 13.28 | 1827                      |        | 2267   |                |     |     |                        | x        |        |            |            | x  |     |  | 43 |    |
| Metrifonate    |         |         |         |                  |      |      | 0.019 | 0.011  | 0.006  |                |       |       | 2418                      | 2633   | 2746   |                |     |     |                        |          |        |            | x          |    |     |  | 27 |    |
| Micafungin     | 0.0021  |         | 0.0024  | 190              |      | 202  | 0     |        | 0      | 0.163          |       | 0.180 |                           |        |        |                |     |     | x                      | x        |        |            |            | x  |     |  | PP |    |
| Mirabegron     | 0.32    | 0.27    | 0.27    |                  |      |      |       |        |        |                |       |       |                           |        |        |                |     |     | x                      |          |        |            |            |    |     |  | 26 |    |
| Mirodenafil    | 0.0064  |         | 0.0066  |                  |      |      | 0     |        | 0      |                |       |       | 466                       |        | 550    |                |     |     | x                      |          |        |            | x          |    |     |  | 66 |    |
| Mivacurium     |         |         |         | 287              | 232  | 276  |       |        |        |                |       |       |                           |        |        |                |     |     |                        |          | x      |            |            |    |     |  | PP |    |
| Mycophenolate  |         |         |         |                  |      |      | 0     | 0      | 0      |                |       |       | 3150                      | 3703   | 5502   |                |     |     |                        |          |        |            | x          |    |     |  | PP |    |
| Nebivolol      | 0.0179  | 0.0211  | 0.0202  |                  |      |      |       |        |        |                |       |       |                           |        |        |                |     |     | x                      |          |        |            |            |    |     |  | PP |    |
| Nicardipine    | 0.05    |         |         |                  |      |      | 0     | 0      |        | 10.42          | 6.533 |       |                           |        |        |                |     |     |                        |          |        |            |            | x  |     |  | 3  |    |
| Nifedipine     | 0.04    | 0.053   | 0.065   | 780              | 1360 | 1470 |       |        |        |                |       |       |                           |        |        |                |     |     | x                      | x        |        |            |            |    |     |  | 45 |    |
| Nisoldipine    |         |         |         |                  |      |      | 0     | 0      | 0      |                |       |       | 89                        | 126    | 112    |                |     |     |                        |          |        |            | x          |    |     |  | PP |    |
| Oseltamivir    |         |         |         |                  |      |      | 0.051 | 0.02   | 0.007  |                |       |       | 141                       | 195    | 152    |                |     |     |                        |          |        |            | x          |    |     |  | PP |    |
| Oxymorphone    |         |         |         |                  |      |      | 0     | 0      | 0      |                |       |       | 66                        | 98     | 114    |                |     |     |                        |          |        |            | x          |    |     |  | PP |    |
| Paliperidone   | 0.301   | 0.25    | 0.268   |                  |      |      |       |        |        |                |       |       |                           |        |        |                |     |     | x                      |          |        |            |            |    |     |  | PP |    |
| Palonosetron   | 0.38    |         |         | 8814             |      | 9543 | 0.303 |        | 0.156  | 2.471          |       | 2.129 |                           |        |        |                |     |     |                        | x        |        |            |            | x  |     |  | PP |    |
| Pantoprazole   |         |         |         |                  |      |      | 0     |        | 0      |                |       |       | 6650                      |        | 9275   |                |     |     |                        |          |        |            | x          |    |     |  | PP |    |
| Paracetamol    |         |         |         |                  |      |      | 0     | 0      | 0      |                |       |       | 4250                      | 4450   | 3855   |                |     |     |                        |          |        |            | x          |    |     |  | 17 |    |
| Paricalcitol   | 0.0006  | 0.0006  | 0.0007  |                  |      |      |       |        |        |                |       |       |                           |        |        |                |     |     | x                      |          |        |            |            |    |     |  | PP |    |
| Paroxetine     |         |         |         |                  |      |      | 0     | 0      | 0      |                |       |       | 1339                      | 2457   | 4774   |                |     |     |                        |          |        |            | x          |    |     |  | 30 |    |
| Pemetrexed     | 0.18    | 0.207   | 0.266   | 232              | 238  | 314  |       |        |        |                |       |       |                           |        |        |                |     |     | x                      | x        |        |            |            |    |     |  | PP |    |
| Piroxicam      | 0.0142  | 0.0148  |         |                  |      |      | 0     | 0      |        |                |       |       | 461132                    | 419664 |        |                |     |     | x                      |          |        |            | x          |    |     |  | 71 |    |
| Pitavastatin   | 0.00414 | 0.00405 |         |                  |      |      | 0     | 0      |        |                |       |       | 2187                      | 3925   |        |                |     |     | x                      |          |        |            | x          |    |     |  | PP |    |
| Prucalopride   | 0.68    | 0.69    | 0.72    |                  |      |      |       |        |        |                |       |       |                           |        |        |                |     |     | x                      |          |        |            |            |    |     |  | 73 |    |
| Quetiapine     |         |         |         |                  |      |      | 0     |        | 0      |                |       |       | 1171                      |        | 1747   |                |     |     |                        |          |        |            | x          |    |     |  | 79 |    |
| Quinupristin   |         |         |         | 270              |      | 230  |       |        |        |                |       |       |                           |        |        |                |     |     |                        |          | x      |            |            |    |     |  | 20 |    |
| Raloxifene     |         |         |         |                  |      |      | 0     | 0      |        |                |       |       | 14                        | 21     |        |                |     |     |                        |          |        |            | x          |    |     |  | 24 |    |
| Ramelteon      |         |         |         |                  |      |      | 0     | 0      | 0      |                |       |       | 27                        | 37     | 45     |                |     |     |                        |          |        |            | x          |    |     |  | PP |    |
| Ranitidine     | 0.85    |         |         | 847              | 473  | 523  | 0.786 | 0.477  | 0.29   | 10.61          | 4.343 | 3.000 |                           |        |        |                |     |     |                        | x        | x      |            |            | x  |     |  | 46 |    |
| Ranolazine     |         |         |         |                  |      |      | 0     | 0      | 0      |                |       |       | 847                       | 1446   | 1685   |                |     |     |                        |          |        |            | x          |    |     |  | 42 |    |
| Rasagiline     |         |         |         |                  |      |      | 0     | 0      |        |                |       |       | 298                       | 236    |        |                |     |     |                        |          |        |            | x          |    |     |  | PP |    |
| Reboxetine     | 0.0293  | 0.0478  | 0.0485  |                  |      |      | 0.083 | 0.0737 | 0.0344 |                |       |       | 36855                     | 78085  | 103653 |                |     |     | x                      |          |        |            | x          |    |     |  | 22 |    |

\*. PK parameters were recalculated from plsama concentration-time profile; HV, Healthy Volunteer; Mod, Moderate CKD; Sev, Severe CKD; PP, PharmaPendium database

**Supplementary Table 1**  
Continued

| Drug          | $f_p$  |        |        | $V_{ss}$ (mL/kg) |       |       | $f_e$   |         |         | CL (mL/min/kg) |       |       | Normalized AUC (ng hr/mL) |        |        | $t_{1/2}$ (hr) |     |      | Analysis of Alteration |          |                 |                     | Prediction |    | Ref |    |    |
|---------------|--------|--------|--------|------------------|-------|-------|---------|---------|---------|----------------|-------|-------|---------------------------|--------|--------|----------------|-----|------|------------------------|----------|-----------------|---------------------|------------|----|-----|----|----|
|               | HV     | Mod    | Sev    | HV               | Mod   | Sev   | HV      | Mod     | Sev     | HV             | Mod   | Sev   | HV                        | Mod    | Sev    | HV             | Mod | Sev  | $f_p$                  | $V_{ss}$ | CL <sub>R</sub> | CL <sub>Limit</sub> | CL         | PK |     |    |    |
| Regadenoson   | 0.674  | 0.719  | 0.691  | 1064             | 956   | 906   | 0.65    | 0.36    | 0.16    | 8.329          | 4.757 | 3.571 |                           |        |        |                |     |      | x                      | x        | x               |                     |            | x  |     | PP |    |
| Repaglinide   |        |        |        |                  |       |       | 0       | 0       | 0       |                |       |       | 1046                      | 1511   | 2720   |                |     |      |                        |          |                 | x                   |            |    |     | 58 |    |
| Risperidone   | 0.159  | 0.141  | 0.162  |                  |       |       | 0.048   | 0.096   | 0.033   |                |       |       | 1833                      | 5396   | 3791   |                |     |      | x                      |          |                 |                     | x          |    |     | 75 |    |
| Rivaroxaban   | 0.073  | 0.082  | 0.076  |                  |       |       | 0.292   | 0.131   | 0.104   |                |       |       | 9041                      | 14993  | 16153  |                |     |      | x                      |          |                 |                     | x          |    |     | 48 |    |
| Rizatriptan   |        |        |        |                  |       |       | 0.13    | 0.055   | 0.025   |                |       |       | 459                       | 613    | 615    |                |     |      |                        |          |                 |                     | x          |    |     | PP |    |
| Ropivacaine   | 0.0359 | 0.0354 | 0.0327 | 890              | 790   | 812   | 0.0053  | 0.0087  | 0.0104  | 6.030          | 5.247 | 4.985 |                           |        |        |                |     |      | x                      | x        |                 |                     |            | x  |     | 68 |    |
| Rosiglitazone | 0.0016 | 0.0015 | 0.0022 |                  |       |       | 0       | 0       | 0       |                |       |       | 26713                     | 29286  | 21984  |                |     |      | x                      |          |                 |                     | x          |    |     | 18 |    |
| Saxagliptin   |        |        |        |                  |       |       | 0.2     | 0.12    | 0.07    |                |       |       | 1705                      | 2403   | 3442   |                |     |      |                        |          |                 |                     | x          |    |     | 8  |    |
| Sildenafil    | 0.027  | 0.02   | 0.022  |                  |       |       | 0       | 0       | 0       |                |       |       | 1058                      | 1235   | 2127   |                |     |      | x                      |          |                 |                     | x          |    |     | 64 |    |
| Silodosin     | 0.031  | 0.021  |        |                  |       |       |         |         |         |                |       |       |                           |        |        |                |     |      | x                      |          |                 |                     |            |    |     | PP |    |
| Sisomicin     |        |        |        | 174              | 169   | 185   |         |         |         |                |       |       |                           |        |        |                |     |      |                        |          | x               |                     |            |    |     | 63 |    |
| Sparfloxacin  |        |        |        |                  |       |       | 0.083   | 0.092   | 0.04    |                |       |       | 4049                      | 8610   | 7018   |                |     |      |                        |          |                 |                     | x          |    |     | 29 |    |
| Sulpiride     | 1      |        |        | 859              | 1070  | 939   | 0.764   | 0.463   | 0.340   | 1.945          | 1.447 | 0.741 |                           |        |        |                |     |      |                        |          | x               | x                   |            | x  |     | 9  |    |
| Tadalafil     |        |        |        |                  |       |       | 0       | 0       |         |                |       |       | 20076                     | 34377  |        |                |     |      |                        |          |                 |                     | x          |    |     | 33 |    |
| Tamsulosin    | 0.011  | 0.009  | 0.011  |                  |       |       |         |         |         |                |       |       |                           |        |        |                |     |      | x                      |          |                 |                     |            |    |     | PP |    |
| Tapentadol    |        |        |        |                  |       |       | 0.0233  | 0.0171  | 0.00651 |                |       |       | 263                       | 309    | 310    |                |     |      |                        |          |                 |                     | x          |    |     | PP |    |
| Telaprevir    |        |        |        |                  |       |       | 0       | 0       | 0       |                |       |       | 1575                      |        | 1742   |                |     |      |                        |          |                 |                     | x          |    |     | PP |    |
| Telavancin    | 0.135  | 0.122  | 0.133  |                  |       |       | 0.402   | 0.318   | 0.254   | 0.228          | 0.185 | 0.103 |                           |        |        |                |     |      |                        |          |                 |                     | x          |    | x   | PP |    |
| Temocapril    |        |        |        |                  |       |       | 0.017   | 0.003   | 0.001   |                |       |       | 460                       | 765    | 600    |                |     |      |                        |          |                 |                     | x          |    |     | 74 |    |
| Teriflunomide | 0.0025 |        | 0.0025 |                  |       |       |         |         |         |                |       |       |                           |        |        |                |     |      | x                      |          |                 |                     |            |    |     | PP |    |
| Theophylline  | 0.6    |        |        | 480              |       | 430   | 0       |         | 0       | 0.766          |       | 0.782 |                           |        |        |                |     |      |                        |          |                 |                     | x          |    | x   | 47 |    |
| Tiagabine     | 0.041  | 0.0429 | 0.0534 |                  |       |       | 0       | 0       | 0       |                |       |       | 9279                      | 8045   | 9255   |                |     |      | x                      |          |                 |                     | x          |    |     | 15 |    |
| Ticagrelor    | 0.0016 |        | 0.0021 |                  |       |       |         |         |         |                |       |       |                           |        |        |                |     |      | x                      |          |                 |                     |            |    |     | 13 |    |
| Tigecycline   | 0.2    |        |        | 10526            |       | 8648  | 0.212   |         | 0.06    | 5.801          |       | 4.432 |                           |        |        |                |     |      |                        |          |                 |                     | x          |    | x   | PP |    |
| Tiotropium    | 0.25   | 0.26   | 0.26   | 35333            | 17318 | 24219 | 0.601   | 0.399   | 0.374   | 10.86          | 4.187 | 3.635 |                           |        |        |                |     |      | x                      | x        | x               |                     |            | x  |     | 81 |    |
| Tirofiban     | 0.35   |        |        | 507              | 457   | 399   | 0.447   | 0.278   | 0.112   | 7.329          | 2.886 | 1.471 |                           |        |        |                |     |      |                        |          |                 |                     | x          |    | x   | PP |    |
| Tomopenem*    | 0.911  |        |        | 222              | 234   | 173   | 0.574   | 0.626   | 0.412   | 1.633          | 0.553 | 0.267 |                           |        |        | 2.2            | 8.2 | 8.2  |                        |          |                 |                     | x          | x  |     | x  | 55 |
| Vandetanib    | 0.058  | 0.060  | 0.065  |                  |       |       |         |         |         |                |       |       |                           |        |        |                |     |      | x                      |          |                 |                     |            |    |     | 85 |    |
| Vardenafil    | 0.0782 | 0.0683 | 0.0903 |                  |       |       | 0.0101  | 0.00553 | 0.00415 |                |       |       | 273700                    | 357000 | 330050 |                |     |      | x                      |          |                 |                     | x          |    |     | PP |    |
| Varenicline   | 0.879  | 0.853  | 0.892  |                  |       |       |         |         |         |                |       |       |                           |        |        |                |     |      | x                      |          |                 |                     |            |    |     | PP |    |
| Vilazodone    | 0.79   | 0.745  |        |                  |       |       | 0.00814 | 0.0058  |         |                |       |       | 3463                      | 3836   |        |                |     |      | x                      |          |                 |                     | x          |    |     | 7  |    |
| Vildagliptin  |        |        |        |                  |       |       | 0.188   | 0.134   | 0.066   |                |       |       | 1669                      | 2856   | 3115   |                |     |      |                        |          |                 |                     | x          |    |     | 38 |    |
| Zafirlukast   |        |        |        |                  |       |       | 0       |         | 0       |                |       |       | 3505                      |        | 5287   |                |     |      |                        |          |                 |                     | x          |    |     | PP |    |
| Zanamivir*    | 0.1    |        |        | 201              | 204   | 217   | 0.897   | 0.74    | 0.613   | 1.091          | 0.410 | 0.247 |                           |        |        | 2.7            | 6.4 | 11.6 |                        |          |                 |                     | x          | x  |     | x  | 86 |
| Zibotentan    | 0.228  | 0.266  | 0.279  |                  |       |       |         |         |         |                |       |       |                           |        |        |                |     |      | x                      |          |                 |                     |            |    |     | 80 |    |
| Zileuton      | 0.063  | 0.075  | 0.083  |                  |       |       | 0       | 0       | 0       |                |       |       | 2068                      | 2897   | 2457   |                |     |      | x                      |          |                 |                     | x          |    |     | 5  |    |
| Ziprasidone   | 0.0012 | 0.0016 | 0.0013 |                  |       |       |         |         |         |                |       |       |                           |        |        |                |     |      | x                      |          |                 |                     |            |    |     | PP |    |

\*, PK parameters were recalculated from plasma concentration-time profile; HV, Healthy Volunteer; Mod, Moderate CKD; Sev, Severe CKD; PP, PharmaPendium database

**Supplementary Table S2**  
Summary of 1<sup>st</sup> and 2<sup>nd</sup> Dataset

| Dataset         | N  | Administration | Route of Elimination | $f_e$ |          | Number of Compound in Each Group                    |
|-----------------|----|----------------|----------------------|-------|----------|-----------------------------------------------------|
|                 |    |                |                      | Mean  | Range    |                                                     |
| 1 <sup>st</sup> | 76 | PO             | Non-renal            | 0.05  | 0 – 0.34 | Basic: 42<br>Acidic: 15<br>Neutral: 19              |
| 2 <sup>nd</sup> | 40 | IV             | Renal<br>Non-renal   | 0.50  | 0 – 1    | Basic: 15<br>Acidic: 16<br>Neutral: 6<br>Unknown: 3 |

The 1<sup>st</sup> dataset was used to obtain SF for  $CL_{U_{intH}}$  from the alteration in disease conditions.

The 2<sup>nd</sup> dataset was used to validate the predictability of SF for  $CL_{U_{intH}}$ .

**Supplementary Table S3**

Summary of Physiological Parameters used in the PBPK Model

| <b>Tissue</b>   | <b>Tissue<br/>Volume<br/>(mL/kg)</b> | <b>Blood<br/>Flow<br/>(mL/min/kg)</b> |
|-----------------|--------------------------------------|---------------------------------------|
| Venous blood    | 51.4                                 | --                                    |
| Arterial blood  | 25.7                                 | --                                    |
| Lung            | 7.6                                  | 68.3                                  |
| Adipose         | 233.8                                | 3.7                                   |
| Bone            | 105.1                                | 3.7                                   |
| Brain           | 20                                   | 8.9                                   |
| Heart           | 4.7                                  | 3.0                                   |
| Muscle          | 400                                  | 12.6                                  |
| Kidney          | 4.4                                  | 14.1                                  |
| Liver           | 25.7                                 | 4.5                                   |
| Spleen          | 2.6                                  | 1.1                                   |
| Small intestine | 17.1                                 | 13                                    |
| Skin            | 37.1                                 | 3.7                                   |

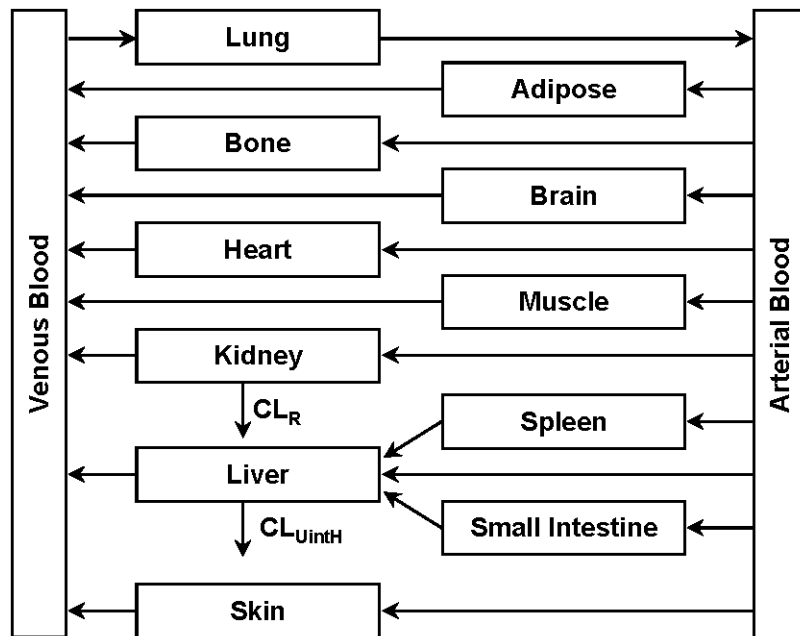

**Supplementary Fig. S1**

Scheme of PBPK model used for simulation of plasma concentration-time profiles in HV and CKD patients.



## References

- 1: Agersø H, Seiding Larsen L, Riis A, Lövgren U, Karlsson MO, Senderovitz T. Pharmacokinetics and renal excretion of desmopressin after intravenous administration to healthy subjects and renally impaired patients. *Br J Clin Pharmacol.* 2004;58:352-358.
- 2: Agrawal NG, Matthews CZ, Mazenko RS, Kline WF, Woolf EJ, Porras AG, et al. Pharmacokinetics of etoricoxib in patients with renal impairment. *J Clin Pharmacol.* 2004;44:48-58.
- 3: Ahmed JH, Grant AC, Rodger RS, Murray GR, Elliott HL. Inhibitory effect of uraemia on the hepatic clearance and metabolism of nifedipine. *Br J Clin Pharmacol.* 1991;32:57-62.
- 4: Anjum S, Swan SK, Lambrecht LJ, Radwanski E, Cutler DL, Affrime MB, et al. Pharmacokinetics of flutamide in patients with renal insufficiency. *Br J Clin Pharmacol.* 1999;47:43-47.
- 5: Awni WM, Wong S, Chu SY, Patterson K, Hansen R, Machinist JM, et al. Pharmacokinetics of zileuton and its metabolites in patients with renal impairment. *J Clin Pharmacol.* 1997;37:395-404.
- 6: Appel-Dingemanse S, Smith T, Merz M. Pharmacokinetics of fluvastatin in subjects with renal impairment and nephrotic syndrome. *J Clin Pharmacol.* 2002;42:312-318.
- 7: Boinpally R, Alcorn H, Adams MH, Longstreth J, Edwards J. Pharmacokinetics of vilazodone in patients with mild or moderate renal impairment. *Clin Drug Investig.* 2013;33:199-206.
- 8: Boulton DW, Li L, Frevert EU, Tang A, Castaneda L, Vachharajani NN, et al. Influence of

- renal or hepatic impairment on the pharmacokinetics of saxagliptin. *Clin Pharmacokinet.* 2011;50:253-265.
- 9: Bressolle F, Brès J, Mourad G. Pharmacokinetics of sulpiride after intravenous administration in patients with impaired renal function. *Clin Pharmacokinet.* 1989;17:367-373.
- 10: Brier ME, Stalker DJ, Aronoff GR, Batts DH, Ryan KK, O'Grady M, et al. Pharmacokinetics of linezolid in subjects with renal dysfunction. *Antimicrob Agents Chemother.* 2003;47:2775-2780.
- 11: Brody SR, Humphreys MH, Gambertoglio JG, Schoenfeld P, Cundy KC, Aweeka FT. Pharmacokinetics of cidofovir in renal insufficiency and in continuous ambulatory peritoneal dialysis or high-flux hemodialysis. *Clin Pharmacol Ther.* 1999;65:21-28.
- 12: Bruderer S, Sasu B, Tsvitbaum N, Dingemans J. Influence of severe renal impairment on the pharmacokinetics of clazosentan. *J Clin Pharmacol.* 2011;51:413-421.
- 13: Butler K, Teng R. Pharmacokinetics, pharmacodynamics, and safety of ticagrelor in volunteers with severe renal impairment. *J Clin Pharmacol.* 2012;52:1388-1398.
- 14: Carlson RV, Bailey RR, Begg EJ, Cowlishaw MG, Sharman JR. Pharmacokinetics and effect on blood pressure of doxazosin in normal subjects and patients with renal failure. *Clin Pharmacol Ther.* 1986;40:561-566.
- 15: Cato A 3rd, Gustavson LE, Qian J, El-Shourbagy T, Kelly EA. Effect of renal impairment on the pharmacokinetics and tolerability of tiagabine. *Epilepsia.* 1998;39:43-47.
- 16: Chan K, Tse J, Jennings F, Orme ML. Pharmacokinetics of low-dose intravenous pethidine in patients with renal dysfunction. *J Clin Pharmacol.* 1987;27:516-522.

- 17: Chan MT, Anderson PJ, Chan JC, Lau GS, Critchley JA. Single-dose pharmacokinetics of paracetamol and its conjugates in Chinese non-insulin-dependent diabetic patients with renal impairment. *Eur J Clin Pharmacol.* 1997;52:285-288.
- 18: Chapelsky MC, Thompson-Culkin K, Miller AK, Sack M, Blum R, Freed MI. Pharmacokinetics of rosiglitazone in patients with varying degrees of renal insufficiency. *J Clin Pharmacol.* 2003;43:252-259.
- 19: Chen N, Lau H, Kong L, Kumar G, Zeldis JB, Knight R, et al. Pharmacokinetics of lenalidomide in subjects with various degrees of renal impairment and in subjects on hemodialysis. *J Clin Pharmacol.* 2007;47:1466-1475.
- 20: Chevalier P, Rey J, Pasquier O, Leclerc V, Baguet JC, Meyrier A, et al. Pharmacokinetics of quinupristin/ dalfopristin in patients with severe chronic renal insufficiency. *Clin Pharmacokinet.* 2000;39:77-84.
- 21: Christensson BA, Nilsson-Ehle I, Hutchison M, Haworth SJ, Oqvist B, Norrby SR. Pharmacokinetics of meropenem in subjects with various degrees of renal impairment. *Antimicrob Agents Chemother.* 1992;36:1532-1537.
- 22: Coulomb F, Ducret F, Laneury JP, Fiorentini F, Poggesi I, Jannuzzo MG, et al. Pharmacokinetics of single-dose reboxetine in volunteers with renal insufficiency. *J Clin Pharmacol.* 2000;40:482-487.
- 23: Cronqvist J, Nilsson-Ehle I, Oqvist B, Norrby SR. Pharmacokinetics of cefepime dihydrochloride arginine in subjects with renal impairment. *Antimicrob Agents Chemother.* 1992;36:2676-2680.
- 24: Czock D, Keller F, Heringa M, Rasche FM. Raloxifene pharmacokinetics in males with

- normal and impaired renal function. *Br J Clin Pharmacol*. 2005;59:479-482.
- 25: De Martin S, Orlando R, Bertoli M, Pegoraro P, Palatini P. Differential effect of chronic renal failure on the pharmacokinetics of lidocaine in patients receiving and not receiving hemodialysis. *Clin Pharmacol Ther*. 2006;80:597-606.
- 26: Dickinson J, Lewand M, Sawamoto T, Krauwinkel W, Schaddelee M, Keirns J, et al. Effect of renal or hepatic impairment on the pharmacokinetics of mirabegron. *Clin Drug Investig*. 2013;33:11-23.
- 27: Dingemans J, Halabi A, Kleinbloesem CH, Heinig R, Blume H. Pharmacokinetics and pharmacodynamics of the acetylcholinesterase inhibitor metrifonate in patients with renal impairment. *Ther Drug Monit*. 1999;21:310-316.
- 28: Dingemans J, van Giersbergen PL. Influence of severe renal dysfunction on the pharmacokinetics and metabolism of bosentan, a dual endothelin receptor antagonist. *Int J Clin Pharmacol Ther*. 2002;40:310-316.
- 29: Dorr MB, Johnson RD, Jensen B, Magner D, Marbury T, Talbot GH. Pharmacokinetics of sparfloxacin in patients with renal impairment. *Clin Ther*. 1999;21:1202-1215.
- 30: Doyle GD, Laher M, Kelly JG, Byrne MM, Clarkson A, Zussman BD. The pharmacokinetics of paroxetine in renal impairment. *Acta Psychiatr Scand Suppl*. 1989;350:89-90.
- 31: Durnin C, Hind ID, Wickens MM, Yates DB, Molz KH. Pharmacokinetics of oral immediate-release hydromorphone (Dilaudid IR) in subjects with renal impairment. *Proc West Pharmacol Soc*. 2001;44:81-82.
- 32: Efthymiopoulos C, Bramer SL, Maroli A, Gambertoglio JG. Effect of renal impairment on

- the pharmacokinetics of grepafloxacin. *Clin Pharmacokinet.* 1997;33 Suppl 1:32-38.
- 33: Forgue ST, Phillips DL, Bedding AW, Payne CD, Jewell H, Patterson BE, et al. Effects of gender, age, diabetes mellitus and renal and hepatic impairment on tadalafil pharmacokinetics. *Br J Clin Pharmacol.* 2007;63:24-35.
- 34: Glue P, Sulowicz W, Colucci R, Banfield C, Pai S, Lin C, et al. Single-dose pharmacokinetics of felbamate in patients with renal dysfunction. *Br J Clin Pharmacol.* 1997;44:91-93.
- 35: Graefe-Mody U, Friedrich C, Port A, Ring A, Retlich S, Heise T, et al. Effect of renal impairment on the pharmacokinetics of the dipeptidyl peptidase-4 inhibitor linagliptin. *Diabetes Obes Metab.* 2011;13:939-946.
- 36: Halstenson CE, Kelloway JS, Affrime MB, Lin CC, Teal MA, Shapiro BE, et al. Isepamicin disposition in subjects with various degrees of renal function. *Antimicrob Agents Chemother.* 1991;35:2382-2387.
- 37: Haubitz M, Bohnenstengel F, Brunkhorst R, Schwab M, Hofmann U, Busse D. Cyclophosphamide pharmacokinetics and dose requirements in patients with renal insufficiency. *Kidney Int.* 2002;61:1495-1501.
- 38: He YL, Kulmatycki K, Zhang Y, Zhou W, Reynolds C, Ligueros-Saylan, et al. Pharmacokinetics of vildagliptin in patients with varying degrees of renal impairment. *Int J Clin Pharmacol Ther.* 2013;51:693-703.
- 39: Horber F, Egger HJ, Weidekamm E, Dubach UC, Frey FJ, Probst PJ, et al. Pharmacokinetics of carumonam in patients with renal insufficiency. *Antimicrob Agents Chemother.* 1986;29:116-121.

- 40: Hui KK, Duchin KL, Kripalani KJ, Chan D, Kramer PK, Yanagawa N. Pharmacokinetics of fosinopril in patients with various degrees of renal function. *Clin Pharmacol Ther.* 1991;49:457-467.
- 41: Jannuzzo MG, Poggesi I, Spinelli R, Rocchetti M, Cicioni P, Buchan P. The effects of degree of hepatic or renal impairment on the pharmacokinetics of exemestane in postmenopausal women. *Cancer Chemother Pharmacol.* 2004;53:475-481.
- 42: Jerling M, Abdallah H. Effect of renal impairment on multiple-dose pharmacokinetics of extended-release ranolazine. *Clin Pharmacol Ther.* 2005;78:288-297.
- 43: Jordö L, Attman PO, Aurell M, Johansson L, Johnsson G, Regårdh CG. Pharmacokinetic and pharmacodynamic properties of metoprolol in patients with impaired renal function. *Clin Pharmacokinet.* 1980;5:169-180.
- 44: Joukhadar C, Herranz U, Pernerstorfer T, Assandri A, Klein N, Schrolnberger, et al. Pharmacokinetics of emedastine difumarate, a new anti-histaminic agent in patients with renal impairment. *Eur J Clin Pharmacol.* 2001;56:905-910.
- 45: Kleinbloesem CH, van Brummelen P, van Harten J, Danhof M, Breimer DD. Nifedipine: influence of renal function on pharmacokinetic/hemodynamic relationship. *Clin Pharmacol Ther.* 1985;37:563-574.
- 46: Koch KM, Liu M, Davis IM, Shaw S, Yin Y. Pharmacokinetics and pharmacodynamics of ranitidine in renal impairment. *Eur J Clin Pharmacol.* 1997;52:229-234.
- 47: Kraan J, Jonkman JH, Koëter GH, Gips CH, de Jong PE, van der Mark TW, et al. The pharmacokinetics of theophylline and enprofylline in patients with liver cirrhosis and in patients with chronic renal disease. *Eur J Clin Pharmacol.* 1988;35:357-362.

- 48: Kubitza D, Becka M, Mueck W, Halabi A, Maatouk H, Klause N, et al. Effects of renal impairment on the pharmacokinetics, pharmacodynamics and safety of rivaroxaban, an oral, direct Factor Xa inhibitor. *Br J Clin Pharmacol*. 2010;70:703-712.
- 49: Lehmann CR, Heironimus JD, Collins CB, O'Neil TJ, Pierson WP, Crowe JT, et al. Metoclopramide kinetics in patients with impaired renal function and clearance by hemodialysis. *Clin Pharmacol Ther*. 1985;37:284-289.
- 50: Lettieri JT, Scheerans C, Blunck M, Mazzu AL, Frey R, Mück W, et al. Assessment of the effects of renal impairment on the pharmacokinetics of the soluble guanylate cyclase activator cinaciguat after a single intravenous dose. *J Clin Pharmacol*. 2012;52:1240-1247.
- 51: Lorusso V, Taroni P, Alvino S, Spinazzi A. Pharmacokinetics and safety of iomeprol in healthy volunteers and in patients with renal impairment or end-stage renal disease requiring hemodialysis. *Invest Radiol*. 2001;36:309-316.
- 52: Lunell E, Borgå O, Larsson R. Pharmacokinetics of enprofylline in patients with impaired renal function after a single intravenous dose. *Eur J Clin Pharmacol*. 1984;26:87-93.
- 53: MacGowan AP. Pharmacokinetic and pharmacodynamic profile of linezolid in healthy volunteers and patients with Gram-positive infections. *J Antimicrob Chemother*. 2003;51 Suppl 2:ii17-25.
- 54: Macha S, Mattheus M, Halabi A, Pinnetti S, Woerle HJ, Broedl UC. Pharmacokinetics, pharmacodynamics and safety of empagliflozin, a sodium glucose cotransporter 2 (SGLT2) inhibitor, in subjects with renal impairment. *Diabetes Obes Metab*. 2014;16:215-222.

- 55: Mallalieu NL, Lennon S, Liu M, Kirkpatrick C, Robson R, Luedin E, et al. Effect of impaired renal function on the pharmacokinetics of tomopenem (RO4908463/CS-023), a novel carbapenem. *Antimicrob Agents Chemother.* 2008;52:2360-2366.
- 56: Mallikaarjun S, Forbes WP, Bramer SL. Effect of renal impairment on the pharmacokinetics of cilostazol and its metabolites. *Clin Pharmacokinet.* 1999;37 Suppl 2:33-40.
- 57: Mallikaarjun S, Shoaf SE, Boulton DW, Bramer SL. Effects of hepatic or renal impairment on the pharmacokinetics of aripiprazole. *Clin Pharmacokinet.* 2008;47:533-542.
- 58: Marbury TC, Ruckle JL, Hatorp V, Andersen MP, Nielsen KK, Huang WC, et al. Pharmacokinetics of repaglinide in subjects with renal impairment. *Clin Pharmacol Ther.* 2000;67:7-15.
- 59: Marbury TC, Blum RA, Rauch C, Pinquier JL. Pharmacokinetics and safety of a single oral dose of once-daily alfuzosin, 10 mg, in male subjects with mild to severe renal impairment. *J Clin Pharmacol.* 2002;42:1311-1317.
- 60: Martin DE, Chapelsky MC, Ilson B, Tenero D, Boike SC, Zariffa N, et al. Pharmacokinetics and protein binding of eprosartan in healthy volunteers and in patients with varying degrees of renal impairment. *J Clin Pharmacol.* 1998;38:129-137.
- 61: Mayer MD, Khosravan R, Vernillet L, Wu JT, Joseph-Ridge N, Mulford DJ. Pharmacokinetics and pharmacodynamics of febuxostat, a new non-purine selective inhibitor of xanthine oxidase in subjects with renal impairment. *Am J Ther.* 2005;12:22-34.



- 62: Moritoyo T, Hasunuma T, Harada K, Tateishi T, Watanabe M, Kotegawa T, et al. Effect of renal impairment on the pharmacokinetics of memantine. *J Pharmacol Sci.* 2012;119:324-329.
- 63: Mosegaard A, Welling PG, Tse FL, Madsen P. Treatment with sisomicin of complicated urinary tract infections in patients with varying degrees of renal function impairment, pharmacokinetics and dosage adjustment. *Infection.* 1975;3:143-147.
- 64: Muirhead GJ, Wilner K, Colburn W, Haug-Pihale G, Rouviex B. The effects of age and renal and hepatic impairment on the pharmacokinetics of sildenafil. *Br J Clin Pharmacol.* 2002;53 Suppl 1:21S-30S.
- 65: Nichols AI, Richards LS, Behrle JA, Posener JA, McGrory SB, Paul J. The pharmacokinetics and safety of desvenlafaxine in subjects with chronic renal impairment. *Int J Clin Pharmacol Ther.* 2011;49:3-13.
- 66: Noh YH, Lim HS, Cho SH, Ghim JL, Choe S, Jung JA, et al. Assessment of the influence of severe renal impairment on the pharmacokinetics of mirodenafil in Korean male volunteers. *Int J Clin Pharmacol Ther.* 2012;50:880-888.
- 67: Peeters P, Bockbrader H, Spaans E, Dogterom P, Lasseter K, Marbury T, et al. Asenapine pharmacokinetics in hepatic and renal impairment. *Clin Pharmacokinet.* 2011;50:471-481.
- 68: Pere PJ, Ekstrand A, Salonen M, Honkanen E, Sjövall J, Henriksson J, et al. Pharmacokinetics of ropivacaine in patients with chronic renal failure. *Br J Anaesth.* 2011;106:512-521.
- 69: Preston RA, Karim A, Dudkowski C, Zhao Z, Garg D, Lenz O, et al. Single-center

evaluation of the single-dose pharmacokinetics of the angiotensin II receptor antagonist azilsartan medoxomil in renal impairment. *Clin Pharmacokinet.* 2013;52:347-358.

70: Ravis WR, Reid S, Sica DA, Tolbert DS. Pharmacokinetics of eplerenone after single and multiple dosing in subjects with and without renal impairment. *J Clin Pharmacol.* 2005;45:810-821.

71: Rudy AC, Figueroa NL, Hall SD, Brater DC. The pharmacokinetics of piroxicam in elderly persons with and without renal impairment. *Br J Clin Pharmacol.* 1994;37:1-5.

72: Smith BR, LeFrock JL, Thyrum PT, Doret BA, Yeh C, Onesti G, et al. Cefotetan pharmacokinetics in volunteers with various degrees of renal function. *Antimicrob Agents Chemother.* 1986;29:887-893.

73: Smith WB, Mannaert E, Verhaeghe T, Kerstens R, Vandeplassche L, Van de Velde V. Effect of renal impairment on the pharmacokinetics of prucalopride: a single-dose open-label Phase I study. *Drug Des Devel Ther.* 2012;6:407-415.

74: Sierakowski B, Püchler K, Witte PU, Renneisen K, Roots I. Single-dose pharmacokinetics of temocapril and temocapril diacid in subjects with varying degrees of renal impairment. *Eur J Clin Pharmacol.* 1997;53:215-220.

75: Snoeck E, Van Peer A, Sack M, Horton M, Mannens G, Woestenborghs R, et al. Influence of age, renal and liver impairment on the pharmacokinetics of risperidone in man. *Psychopharmacology.* 1995;122:223-229.

76: Sobue S, Tan K, Layton G, Leclerc V, Weil A. The effects of renal impairment on the pharmacokinetics and safety of fosfluconazole and fluconazole following a single intravenous bolus injection of fosfluconazole. *Br J Clin Pharmacol.* 2004;57:773-784.

- 77: St Peter JV, Brady ME, Foote EF, Dandekar KA, Smaldone L, Pykkonen JL, et al. The disposition and protein binding of batanopride and its metabolites in subjects with renal impairment. *Eur J Clin Pharmacol.* 1993;45:59-63.
- 78: Swan SK, Smith WB, Marbury TC, Schumacher M, Dougherty C, Mico BA, et al. Pharmacokinetics of maribavir, a novel oral anticytomegalovirus agent, in subjects with varying degrees of renal impairment. *J Clin Pharmacol.* 2007;47:209-217.
- 79: Thyrum PT, Wong YW, Yeh C. Single-dose pharmacokinetics of quetiapine in subjects with renal or hepatic impairment. *Prog Neuropsychopharmacol Biol Psychiatry.* 2000;24:521-533.
- 80: Tomkinson H, Kemp J, Oliver S, Swaisland H, Taboada M, Morris T. Pharmacokinetics and tolerability of zibotentan (ZD4054) in subjects with hepatic or renal impairment: two open-label comparative studies. *BMC Clin Pharmacol.* 2011;11:3.
- 81: Türck D, Weber W, Sigmund R, Budde K, Neumayer HH, Fritsche L, et al. Pharmacokinetics of intravenous, single-dose tiotropium in subjects with different degrees of renal impairment. *J Clin Pharmacol.* 2004;44:163-172.
- 82: Turpeinen M, Koivuviita N, Tolonen A, Reponen P, Lundgren S, Miettunen J, et al. Effect of renal impairment on the pharmacokinetics of bupropion and its metabolites. *Br J Clin Pharmacol.* 2007;64:165-173.
- 83: Vaidyanathan S, Bigler H, Yeh C, Bizot MN, Dieterich HA, Howard D, et al. Pharmacokinetics of the oral direct renin inhibitor aliskiren alone and in combination with irbesartan in renal impairment. *Clin Pharmacokinet.* 2007;46:661-675.
- 84: Vormfelde SV, Mück W, Freudenthaler SM, Heyen P, Schmage N, Kuhlmann J, et al.

Pharmacokinetics of cerivastatin in renal impairment are predicted by low serum albumin concentration rather than by low creatinine clearance. *J Clin Pharmacol.* 1999;39:147-154.

85: Weil A, Martin P, Smith R, Oliver S, Langmuir P, Read, et al. Pharmacokinetics of vandetanib in subjects with renal or hepatic impairment. *Clin Pharmacokinet.* 2010;49:607-618.

86: Weller S, Jones LS, Lou Y, Peppercorn A, Ng-Cashin J. Pharmacokinetics of zanamivir following intravenous administration to subjects with and without renal impairment. *Antimicrob Agents Chemother.* 2013;57:2967-2971.

87: Wootton R, Soul-Lawton J, Rolan PE, Sheung CT, Cooper JD, Posner J. Comparison of the pharmacokinetics of lamotrigine in patients with chronic renal failure and healthy volunteers. *Br J Clin Pharmacol.* 1997;43:23-27.
